# Supplementary material for: Comparative Evaluation of Allplex Respiratory Panels 1, 2, 3, and BioFire FilmArray Respiratory Panel for the Detection of Respiratory Infections
Source: MDPI journal article supplement (doi:10.3390/diagnostics12010009), 2021-12-22
Supplement: s1 [file s1]

**Table S1.** NPS specimens with co-infection of two or more viruses. The simultaneously detected targets by Allplex RP 1, 2, 3, and BioFire FilmArray RP assays are shown.

| NPS specimen no. | Allplex RP 1,2,3                           | Ct value                                                 | Biofire FilmArray RP      |
|------------------|--------------------------------------------|----------------------------------------------------------|---------------------------|
| 1                | AdV<br>PIV-2<br>HEV<br>HRV                 | Ct:17.93<br>Ct:22.42<br>Ct:37.04<br>Ct:39.35             | AdV<br>PIV-2              |
| 8                | AdV<br>HRV                                 | Ct:19.10<br>Ct:38.24                                     | AdV                       |
| 9                | PIV-3<br>HBoV-1/2/3/4                      | Ct:20.29<br>Ct:41.32                                     | PIV-3                     |
| 12               | HBoV-1/2/3/4<br>HEV<br>HRV                 | Ct:26.16<br>Ct:22.87<br>Ct:38.03                         | HEV/HRV                   |
| 23               | AdV<br>HBoV-1/2/3/4                        | Ct:22.35<br>Ct:41.74                                     | AdV                       |
| 24               | PIV-4<br>HEV<br>HRV                        | Ct:21.31<br>Ct:22.05<br>Ct:28.46                         | PIV-4<br>HEV/HRV          |
| 31               | AdV<br>HEV                                 | Ct:21.54<br>Ct:36.81                                     | AdV                       |
| 37               | HRV<br>HEV                                 | Ct:28.45<br>Ct:36.31                                     | HEV/HRV                   |
| 38               | HEV<br>HRV<br>PIV-4<br>HBoV-1/2/3/4        | Ct:37.77<br>Ct:29.7<br>Ct:22.13<br>Ct:36.99              | HEV/HRV<br>PIV-4<br>PIV-3 |
| 44               | HEV<br>HRV<br>AdV<br>HBoV-1/2/3/4<br>PIV-4 | Ct:38.35<br>Ct:26.44<br>Ct:31.68<br>Ct:32.39<br>Ct:35.23 | HEV/HRV<br>AdV            |
| 49               | HRV<br>HBoV-1/2/3/4                        | Ct:41.01<br>Ct:40.01                                     |                           |
| 50               | HRV<br>PIV-1                               | Ct:25.59<br>Ct:37.84                                     | HEV/HRV                   |
| 51               | AdV<br>HRV                                 | Ct:20.75<br>Ct:30.99                                     | AdV<br>HEV/HRV            |
| 63               | AdV                                        | Ct:16.26                                                 | AdV                       |

|     |                            |                                  |                      |
|-----|----------------------------|----------------------------------|----------------------|
|     | PIV-4<br>HRV               | Ct:37.38<br>Ct:36.57             |                      |
| 67  | AdV<br>HRV                 | Ct:16.76<br>Ct:34.45             | AdV<br>HEV/HRV       |
| 69  | AdV<br>HRV<br>PIV-1        | Ct:15.15<br>Ct:32.97<br>Ct:39.45 | AdV<br>HEV/HRV       |
| 70  | AdV<br>HRV                 | Ct:38.49<br>Ct:21.46             | HEV/HRV              |
| 78  | HEV<br>HRV<br>PIV-1        | Ct:38.92<br>Ct:24.71<br>Ct:41.34 | HEV/HRV              |
| 81  | AdV<br>HEV                 | Ct:36.96<br>Ct:37.87             | AdV                  |
| 88  | HEV<br>HRV                 | Ct:22.23<br>Ct:28.51             | HEV/HRV              |
| 92  | AdV<br>HRV<br>RSV-A        | Ct:18.97<br>Ct:27.46<br>Ct:40.29 | AdV<br>HEV/HRV       |
| 100 | AdV<br>HRV<br>HBoV-1/2/3/4 | Ct:16.87<br>Ct:33.98<br>Ct:38.62 | AdV<br>HEV/HRV       |
| 108 | PIV-1<br>RSV-B<br>HRV      | Ct:36.86<br>Ct:29.77<br>Ct:36.64 | PIV-1<br>RSV-A/RSV-B |
| 115 | AdV<br>HRV<br>HBoV-1/2/3/4 | Ct:14.67<br>Ct:25.88<br>Ct:39.13 | AdV<br>HEV/HRV       |
| 116 | FluA<br>FluA (H1pdm09)     | Ct:26.76<br>Ct:21.14             | FluA (H1-2009)       |
| 117 | HEV<br>HRV<br>HBoV-1/2/3/4 | Ct:32.47<br>Ct:30.08<br>Ct:34.50 | HEV/HRV              |
| 119 | AdV<br>HRV                 | Ct:19.33<br>Ct:39.72             | AdV                  |
| 120 | HEV<br>HRV<br>PIV-2        | Ct:38.97<br>Ct:35.90<br>Ct:37.00 |                      |
| 123 | HRV<br>AdV                 | Ct:32.01<br>Ct:41.38             | AdV                  |

|     |                        |                                  |                               |
|-----|------------------------|----------------------------------|-------------------------------|
| 127 | PIV-2<br>HRV<br>AdV    | Ct:38.84<br>Ct:31.65<br>Ct:41.25 |                               |
| 135 | FluA<br>FluA (H1pdm09) | Ct:33.42<br>Ct:30.35             | FluA<br>FluA (H1-2009)<br>AdV |
| 136 | AdV<br>HRV             | Ct:29.63<br>Ct:24.35             | AdV<br>HEV/HRV                |
| 140 | HRV<br>HEV             | Ct:33.58<br>Ct:33.90             |                               |
| 143 | RSV-B                  | Ct:24.80                         | RSV-A/RSV-B<br>AdV            |
| 145 | HRV<br>RSV-A<br>AdV    | Ct:40.20<br>Ct:20.29<br>Ct:38.63 | RSV-A/RSV-B<br>AdV            |
| 146 | PIV-2<br>HRV<br>AdV    | Ct:37.44<br>Ct:34.76<br>Ct:41.02 |                               |
| 154 | HRV<br>HEV             | Ct:33.20<br>Ct:35.39             | HEV/HRV                       |
| 157 | PIV-3<br>HRV           | Ct:37.97<br>Ct:34.95             | HEV/HRV                       |
| 160 | HRV<br>HEV             | Ct:35.53<br>Ct:37.36             |                               |
| 161 | HRV<br>AdV             | Ct:27.16<br>Ct:18.77             | HEV/HRV<br>AdV                |
| 162 | HRV<br>HEV<br>AdV      | Ct:25.23<br>Ct:36.22<br>Ct:35.26 | HEV/HRV<br>AdV                |
| 177 | HRV<br>HEV             | Ct:36.21<br>Ct:36.23             | PIV-1                         |

The red text indicates the targets that were only detected by one RP assay.
